# Supplementary figures and images for: Clinicopathological Analysis and Literature Review of Four Cases of Lynch-like Syndrome
Source: Research Square preprint supplement (doi:10.21203/rs.3.rs-7247415/v1), 2025-08-07

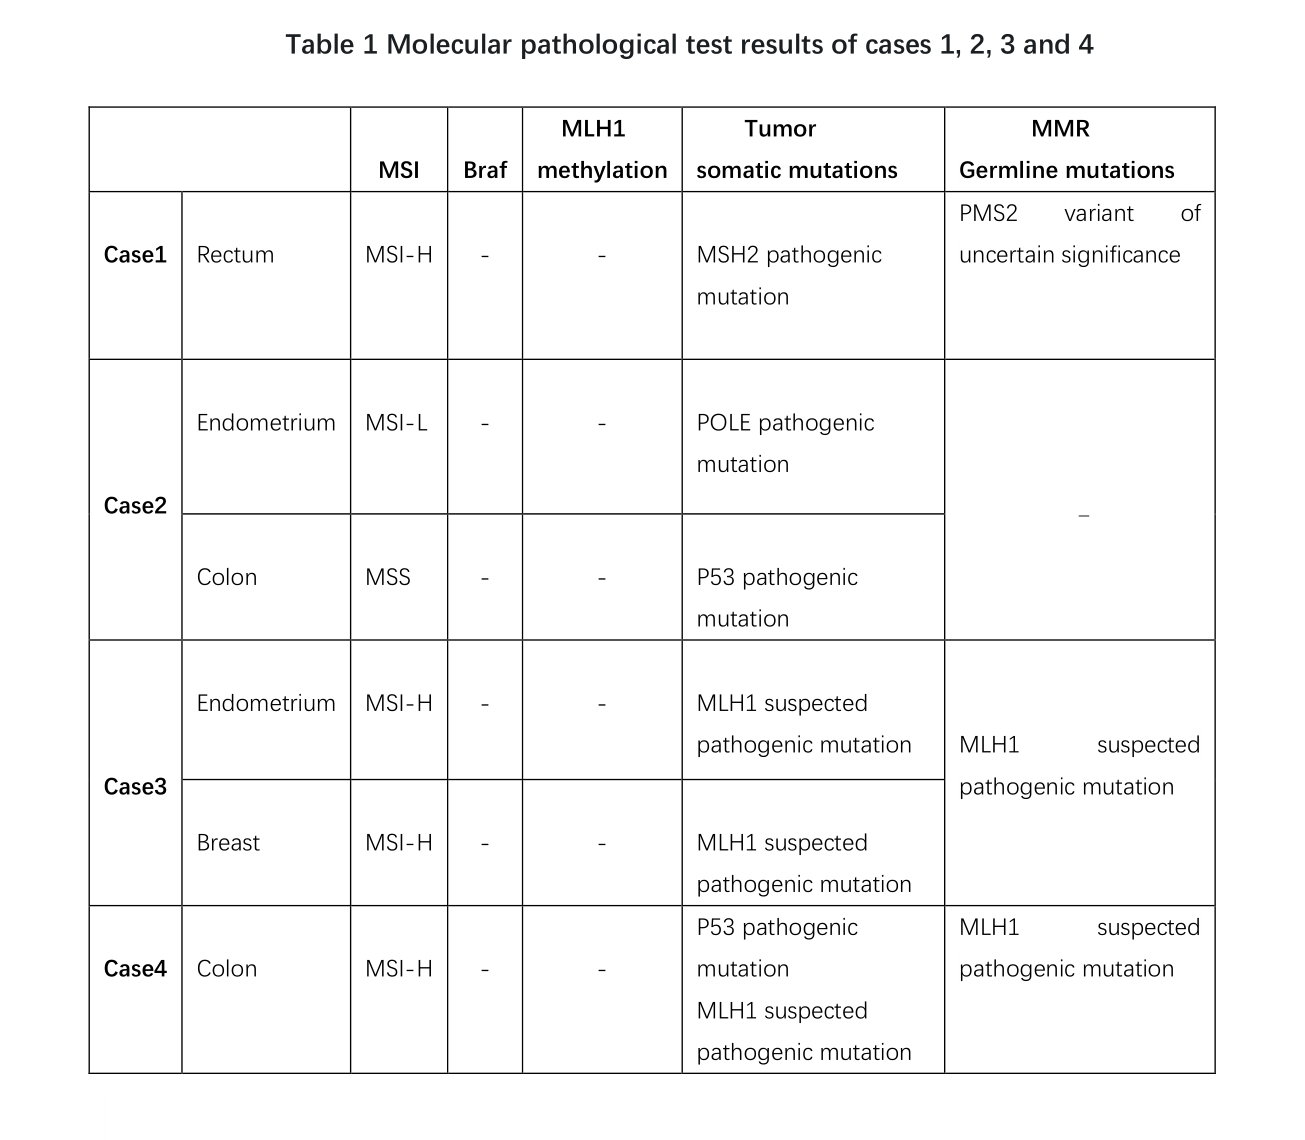

Supplement: Supplementary file 1 [file adb828e35f12942914541f95.docx]
